# Supplementary material
Source: publisher figshare collection journal article supplement (https://tandf.figshare.com/ndownloader/files/12248303)
Supplement: Supplementary file 1 [file 12248303]

Table S 1. Changes in weight of rabbits after operation

| No. | day of surgery/kg | 4 weeks/kg | 12 weeks/kg | 26 weeks/kg |
| --- | --- | --- | --- | --- |
| A417 | 3.72 | 3.78（sample） |  |  |
| A237 | 3.48 | 4.08 | 3.82 | 4.47（sample） |
| A426 | 3.12 | 3.50（sample） |  |  |
| A135 | 3.11 | 3.6 | 3.72 | 3.89（sample） |
| A256 | 3.69 | 3.99（sample） |  |  |
| A104 | 3.58 | 4.04 | 4.22 | 4.52（sample） |
| A051 | 3.42 | 3.84 | 4 | 4.47（sample） |
| A404 | 3.39 | 3.8 | 3.91（sample） |  |
| A314 | 3.62 | 3.63（sample） |  |  |
| A331 | 3.75 | 4.2 | 4.36（sample） |  |
| A329 | 3.58 | 3.76 | 4.06（sample） |  |
| A129 | 3.36 | 3.81 | 4.01 | 4.53 |
| A272 | 3.56 | 3.67（sample） |  |  |
| A101 | 3.36 | 3.72 | 3.8（sample） |  |
| A380 | 3.72 | 4.11 | 4.45（sample） |  |
| A377 | 3.56 | 3.88 | 4.15 | 4.52（sample） |
| A103 | 3.53 | 3.64（sample） |  |  |
| A230 | 3.45 | 3.96 | 4.13 | 4.59（sample） |
| A302 | 3.46 | 3.88 | 3.98 | 4.25 |
| A428 | 3.52 | 3.75 | 3.91（sample） |  |
